# Supplementary material for: Identification of fragments targeting SMYD3 using highly sensitive kinetic and multiplexed biosensor-based screening
Source: Royal Society of Chemistry journal article supplement (doi:10.1039/d4md00093e), 2024-01-01
Supplement: d4md00093e1.pdf [file d4md00093e1.pdf]

*Supplementary data*

**Identification of fragments targeting SMYD3 using highly sensitive kinetic and multiplexed biosensor-based screening**

Edward A. FitzGerald,<sup>a,b</sup> Daniela Cederfelt,<sup>a</sup> Bjarte Aarmo Lund,<sup>a,d</sup> Nadine E. M. Myers<sup>a,b</sup> He Zhang,<sup>a</sup> Doreen Dobritzsch<sup>a</sup> and U. Helena Danielson<sup>a,c</sup>\*

---

<sup>a</sup> Department of Chemistry - BMC, Uppsala University, Uppsala, Sweden.

<sup>b</sup> Beactica Therapeutics, Virdings allé 2, Uppsala, Sweden.

<sup>c</sup> Science for Life Laboratory, Uppsala University, Uppsala, Sweden.

<sup>d</sup> Department of Chemistry, UiT The Arctic University of Norway, Tromsø, Norway.

\* Corresponding author: [helena.danielson@kemi.uu.se](mailto:helena.danielson@kemi.uu.se)

**A**

FL01507

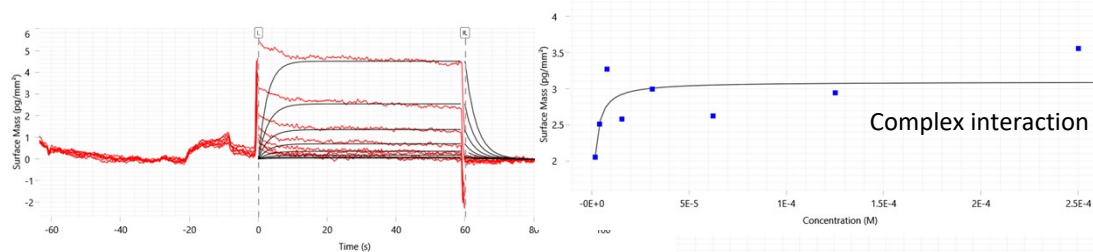

FL06268

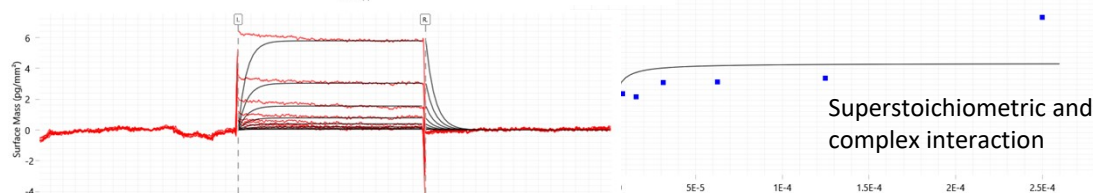

FL08619

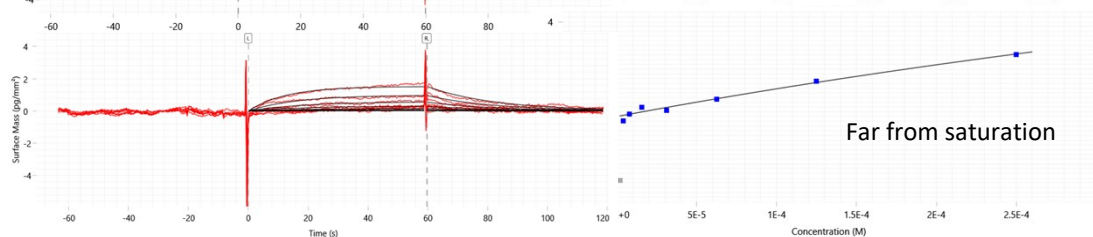**B**

FL01677

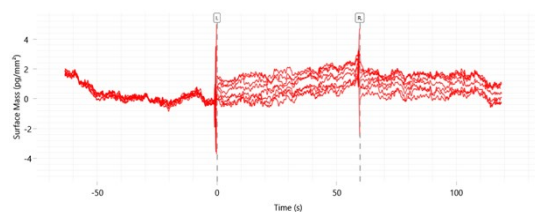

No binding

FL01750

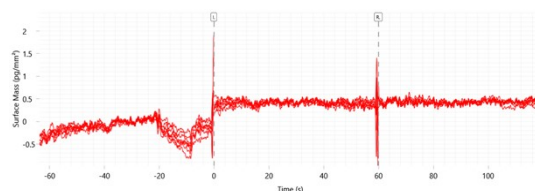

No binding

Figure 1. Examples of sensorgrams from multicycle kinetic experiments with initial fragment hits and SMYD3. A) Fragments for which crystal structures of the complex with SMYD3 were obtained. A global fit of the sensorgrams using a 1:1 interaction model shows that the interactions have low affinity and are complex. B) Fragments for which crystal structures were not obtained.

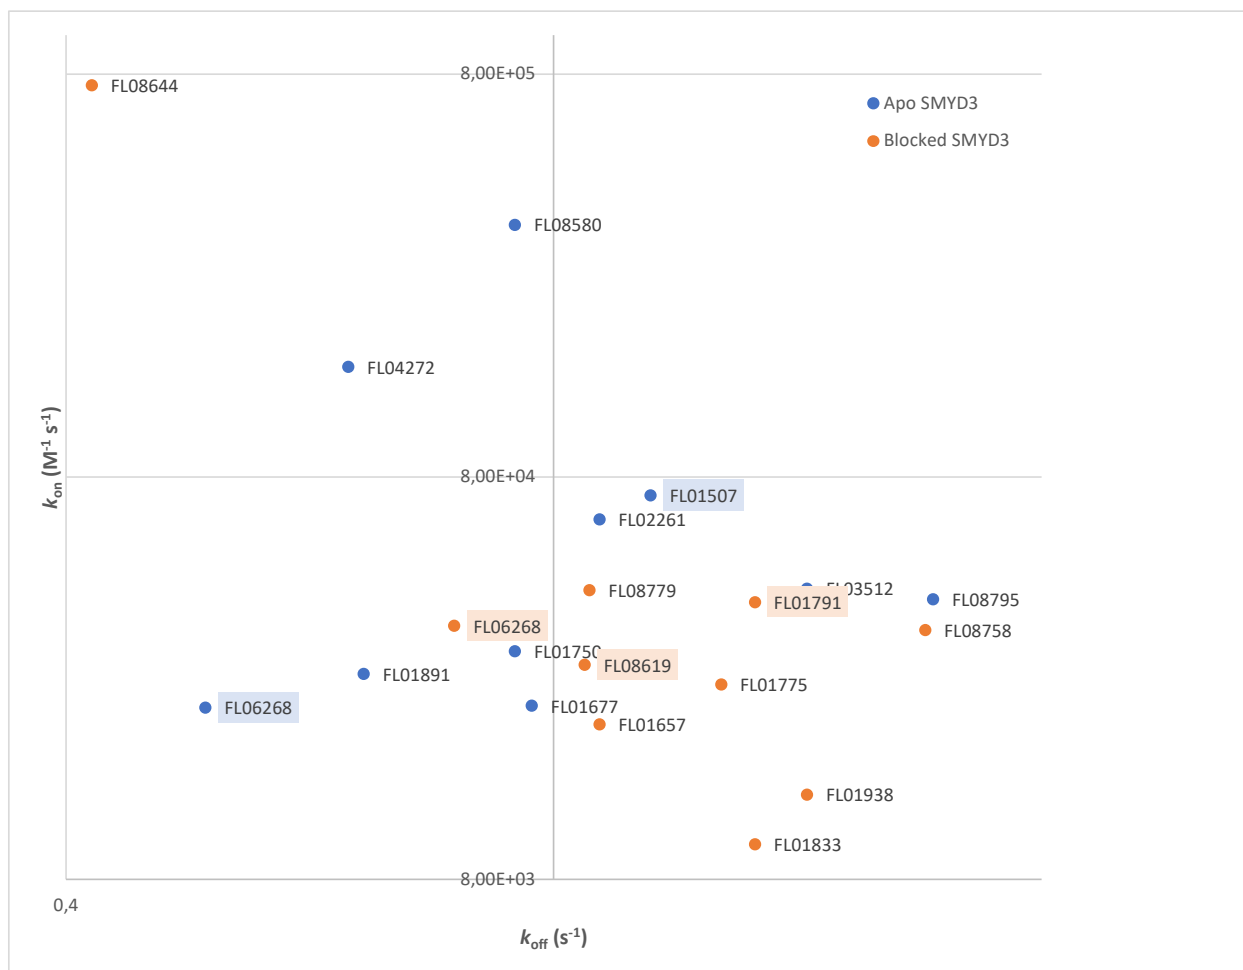

Figure 2. Interaction kinetic plot for initially selected hits, based on data from kinetic screen (Table 1). Fragments that were successfully crystallised have shaded labels.

Table 1: Data collection and refinement statistics for crystal structures of SMYD3 with fragment hits. Values in brackets are for the outer resolution shell.

| <b>Fragment</b>                    | <b>FL01507</b>                                 | <b>FL01791</b>                                 | <b>FL08619</b>                                 | <b>FL06268</b>                                 |
|------------------------------------|------------------------------------------------|------------------------------------------------|------------------------------------------------|------------------------------------------------|
| PDB accession code                 | 8OWO                                           | 7QNR                                           | 7QNU                                           | 7QLB                                           |
| <b>Data collection</b>             |                                                |                                                |                                                |                                                |
| X-ray source                       | ESRF ID23-1                                    | ESRF ID23-1                                    | ESRF ID23-1                                    | ESRF ID23-1                                    |
| Space group                        | P 2 <sub>1</sub> 2 <sub>1</sub> 2 <sub>1</sub> | P 2 <sub>1</sub> 2 <sub>1</sub> 2 <sub>1</sub> | P 2 <sub>1</sub> 2 <sub>1</sub> 2 <sub>1</sub> | P 2 <sub>1</sub> 2 <sub>1</sub> 2 <sub>1</sub> |
| Wavelength (Å)                     | 0.9763                                         | 0.9655                                         | 0.9763                                         | 0.9763                                         |
| Unit cell (Å°)                     | 61.1 66.1 107.3<br>90 90 90                    | 60.2 66.2 105.3<br>90 90 90                    | 59.9 65.9 105.1<br>90 90 90                    | 60.9 66.3 108.2<br>90 90 90                    |
| Resolution range (Å)               | 53.08-1.80<br>(1.86-1.80)                      | 44.56-1.57<br>(1.63-1.57)                      | 41.08-1.64<br>(1.70-1.64)                      | 29.33 - 1.80<br>(1.86 - 1.80)                  |
| Unique reflections                 | 40369 (3515)                                   | 58248 (5660)                                   | 48981 (149)                                    | 41050 (3767)                                   |
| Multiplicity                       | 12.8 (8.9)                                     | 4.0 (4.0)                                      | 6.2 (4.6)                                      | 2.0 (2.0)                                      |
| Completeness (%)                   | 98.4 (87.5)                                    | 97.8 (96.3)                                    | 75.0 (2.9)                                     | 99.2 (93.2)                                    |
| R <sub>meas</sub>                  | 0.0524 (0.2858)                                | 0.1531 (2.967)                                 | 0.2339 (3.425)                                 | 0.0270 (0.2042)                                |
| I/σ(I)                             | 31.18 (6.47)                                   | 7.03 (0.50)                                    | 6.45 (0.49)                                    | 24.10 (4.87)                                   |
| CC(1/2)                            | 1 (0.976)                                      | 0.996 (0.171)                                  | 0.991 (0.134)                                  | 0.999 (0.95)                                   |
| <b>Refinement</b>                  |                                                |                                                |                                                |                                                |
| R <sub>work</sub>                  | 0.1555 (0.1668)                                | 0.2036 (0.3746)                                | 0.1855 (0.3124)                                | 0.1506 (0.1913)                                |
| R <sub>free</sub>                  | 0.1810 (0.1972)                                | 0.2339 (0.3429)                                | 0.2296 (0.2889)                                | 0.1834 (0.2308)                                |
| Average B-factor (Å <sup>2</sup> ) | 29.02                                          | 29.62                                          | 23.61                                          | 27.51                                          |
| Protein                            | 28.16                                          | 29.12                                          | 22.60                                          | 26.43                                          |
| Ligands                            | 45.54                                          | 27.46                                          | 22.50                                          | 35.18                                          |
| Solvent                            | 34.64                                          | 34.94                                          | 31.50                                          | 34.06                                          |
| No. non-hydrogen atoms             | 3973                                           | 3822                                           | 3925                                           | 4003                                           |
| Protein                            | 3470                                           | 3443                                           | 3439                                           | 3443                                           |
| Ligands                            | 18                                             | 67                                             | 66                                             | 86                                             |
| Solvent                            | 482                                            | 340                                            | 445                                            | 510                                            |
| r.m.s.d.                           |                                                |                                                |                                                |                                                |
| bond lengths (Å)                   | 0.012                                          | 0.006                                          | 0.009                                          | 0.011                                          |
| bond angles (°)                    | 1.35                                           | 0.84                                           | 0.88                                           | 1.05                                           |
| Ramachandran plot, residues in     |                                                |                                                |                                                |                                                |
| favored region (%)                 | 98.11                                          | 97.64                                          | 98.35                                          | 98.11                                          |
| allowed region (%)                 | 1.89                                           | 2.36                                           | 1.65                                           | 1.89                                           |
| outlier region                     | 0.00                                           | 0.00                                           | 0.00                                           | 0.00                                           |
